## Title: Forces experienced by instrumented animals depend on lifestyle

5 **Authors:** Rory P Wilson<sup>1\*</sup>, Kayleigh A Rose<sup>1</sup>, Richard Gunner<sup>1</sup>, Mark Holton<sup>2</sup>, Nikki J Marks<sup>3</sup>, Nigel C Bennett<sup>4</sup>, Stephen H. Bell<sup>3</sup>, Joshua P Twining<sup>3</sup>, Jamie Hesketh<sup>1</sup>, Carlos M. Duarte<sup>5</sup>, Neil Bezodis<sup>6</sup>, D. Michael Scantlebury<sup>3</sup>.

### Affiliations:

<sup>1</sup>Swansea Lab for Animal Movement, Biosciences, College of Science, Swansea University, Singleton Park, Swansea, SA2 8PP, UK

10 <sup>2</sup>College of Science, Swansea University, Fabian Way, Swansea, SA1 8EN, UK

<sup>3</sup>School of Biological Sciences, Queen's University Belfast, Belfast BT9 5DL, UK

<sup>4</sup>Mammal Research Institute, Department of Zoology and Entomology, University of Pretoria, Pretoria, 0002. South Africa

15 <sup>5</sup>Red Sea Research Centre, King Abdullah University of Science and Technology, Thuwal 23955, Saudi Arabia.

<sup>6</sup>Applied Sports, Technology, Exercise and Medicine (A-STEM) Research Centre, College of Engineering, Swansea University, Bay Campus, Swansea, SA1 8EN, UK

---

\*Correspondence to: [R.P.Wilson@Swansea.ac.uk](mailto:R.P.Wilson@Swansea.ac.uk)

20 **Abstract:** Animal-attached devices have transformed our understanding of vertebrate ecology. However, to be acceptable, researchers must minimize tag-related harm. The long-standing recommendation that tag masses should not exceed 3% of the animal's body mass ignores tag forces generated by movement. We used collar-attached accelerometers on four free-ranging carnivores, spanning two orders of magnitude in mass, to reveal that during movement, forces  
25 exerted by '3%' tags were generally equivalent to 4-19% of the animals' masses, with a record of 54% in a hunting cheetah. Controlled studies on domestic dogs revealed how the tag forces are dictated by animal gait and speed but appear largely invariant of body mass. This fundamentally changes how acceptable tag mass limits should be determined, requiring cognizance of animal athleticism.

30 **One Sentence Summary:** There can be no universal rule for collar-tag masses as a percentage of carrier mass since tag forces depend on lifestyle.

35 **Main Text:** The use of animal-attached devices is transforming our understanding of wild animal ecology and behavior (1, 2). Indeed, smart tags have been used across scales to measure everything from the extraordinary details of high performance hunts in cheetahs (3), to vast cross-taxon comparisons of animal behavior and space-use over whole oceans ((e.g. 1, 4)). A critical proviso is, however, that such devices do not change the behavior of their carriers, for both animal welfare issues as well as for scientific rigor (5). Defining acceptable device loads for

animals is critical because even diminishingly small tags can cause detriment. For example, Saraux et al (6) showed that the addition of flipper rings to penguins can affect their populations, presumed to be due to the tags increasing the drag force in these fast-swimming birds. Performance is relevant in this case because drag-dependent energy expenditure to swim increases with the cube of the speed (7).

Although consideration of the physics of drag has been shown to be a powerful framework with which to understand tag detriment in aquatic animals (e.g.(8) (9)), drag is negligible in terrestrial (though not aerial) systems even though tag detriment in terrestrial animals has been widely reported and is multi-faceted (10). For example, cited issues range from minor behavioral changes (11) through skin-, subcutaneous- and muscle damage with ulceration (12, 13) to reduced movement speed (14) and dramatically increased mortality (15). As with drag, we advocate that a force-based framework is necessary to help understand such detriment. Indeed, force is implicit in ethics-based recommendations for acceptable tag loads because, for example, a central tenet is that animal tags should never exceed 3% or 5% of the animal-carrier body mass (16). Importantly though, we could find no reason for advocating this value, which thus remains arbitrary. Most likely, it was based on the widely accepted 5% significance value used in biological statistics. Implicit in this limit is that consequences, most particularly the physical forces experienced by animals due to tags, are similarly limited. This cannot be true because Newton showed that mass, force and acceleration are linked *via*  $F = ma$ , so animal performance, specifically their acceleration, will affect the tag forces applied to them. Tag forces on their animal carrier can therefore be accessed by measuring acceleration experienced by the tag as the animal moves. We note here though, that this necessitates gathering on-animal data because simple consideration of acceleration from rigid-non-living bodies is inappropriate for living systems composed of multiple interacting segments (17).

Here, we examine the forces exerted by collar-mounted tags on moving animals; lions *Panthera leo*, European badgers *Meles meles*, pine martens *Martes martes* and a cheetah *Acinonyx jubatus* (with body masses roughly spanning 2–200 kg) equipped with accelerometers undertaking their normal activities in the wild. We also equipped twelve domestic dogs *Canis familiaris* (2-45 kg) with the same tags but with masses of up to 3% of the dog body mass as they travelled at defined speeds. In both instances, we examined how the acceleration changed with animal motion and then calculated the forces experienced by the animals due to the tags. In all instances of movement, the tag forces rose, increasing with animal speed and athleticism, escalating in some instances to be much greater than 20% of the carrier's normal body mass. This fundamentally changes how we should view critical limits of tag masses.

Accelerometer data, summarized as the vectorial sum of the three orthogonal axes, from the equipped animals during movement showed tri-modal distributions except for the pine martens which were mono-modal. Following (18) we considered that these most likely corresponded to walking, trotting and bounding (cf. our direct observations of the domestic dogs below); these were further exemplified by variation in the amplitude and periods of peaks in this acceleration metric (Fig. 1). Cumulative frequencies of all acceleration values showed increasing acceleration from walking through trotting to bounding and typically had a roughly logarithmic-type curve for all gaits and animals (Fig. 1). The percentage time during which the tags carried by the carnivores had acceleration exceeding 1 g varied between a mean minimum of 31% for walking

badgers to 88% for bounding cheetahs (Table S1). Furthermore, while species differences in acceleration distributions were not readily apparent for their walking gaits, the percentage time during which acceleration was in excess of 1 g was greatest during bounding, with cheetahs showing the highest values in this category (Fig. 1). Mean peak accelerations per stride across species varied between 1.37 g (SD 0.05) and 6.25 g (SD 0.79) for walking and bounding cheetahs, respectively (Table S2). The maximum recorded value was 18.1 g in a cheetah assumed to be chasing prey.

5

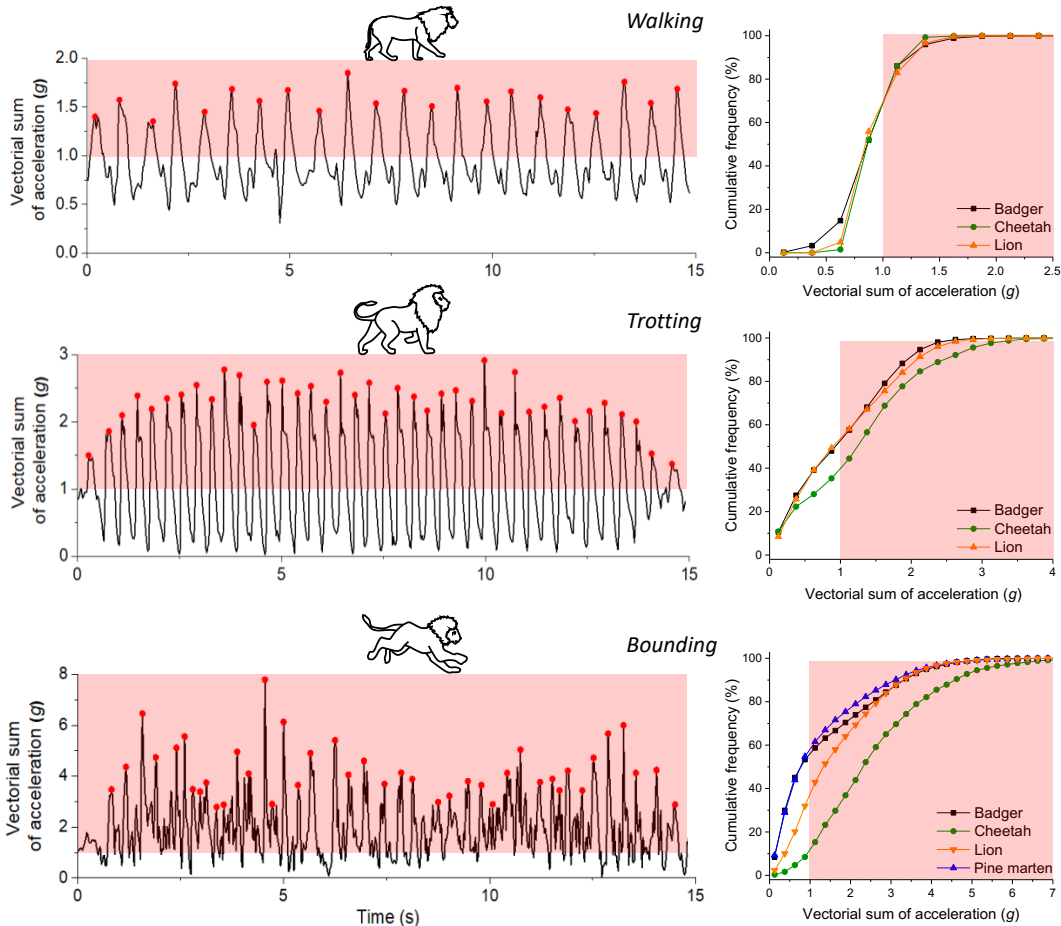

10

**Fig. 1. Acceleration signatures vary according to gait and lifestyle.** Left-hand panels; Acceleration signatures recorded by collar-mounted tags on a lion according to activity. The red areas show when the acceleration exceeded that of gravity (note the changing scales with gait). Right-hand panels; Cumulative frequency of all acceleration values for four free-living carnivores according to gait.

15

Across species, gait was the main factor dictating peak acceleration (Fig. 2) and there were no significant effects of body mass, nor period between peaks (linear mixed-effects model: log period:  $F_{1, 210} = 0.01$ ,  $P = 0.908$ ; gait:  $F_{2, 208} = 1083.07$ ,  $P < 0.0001$ ; body mass:  $F_{1, 19} = 3.00$ ;  $P = 0.100$ , Table S3). The period between acceleration peaks was greater for larger species during slower gaits, but not for bounding (a linear mixed-effects model demonstrated a significant interaction effect between body mass and gait:  $F_{2, 209} = 3.00$ ,  $P < 0.0001$ , Table S3).

20

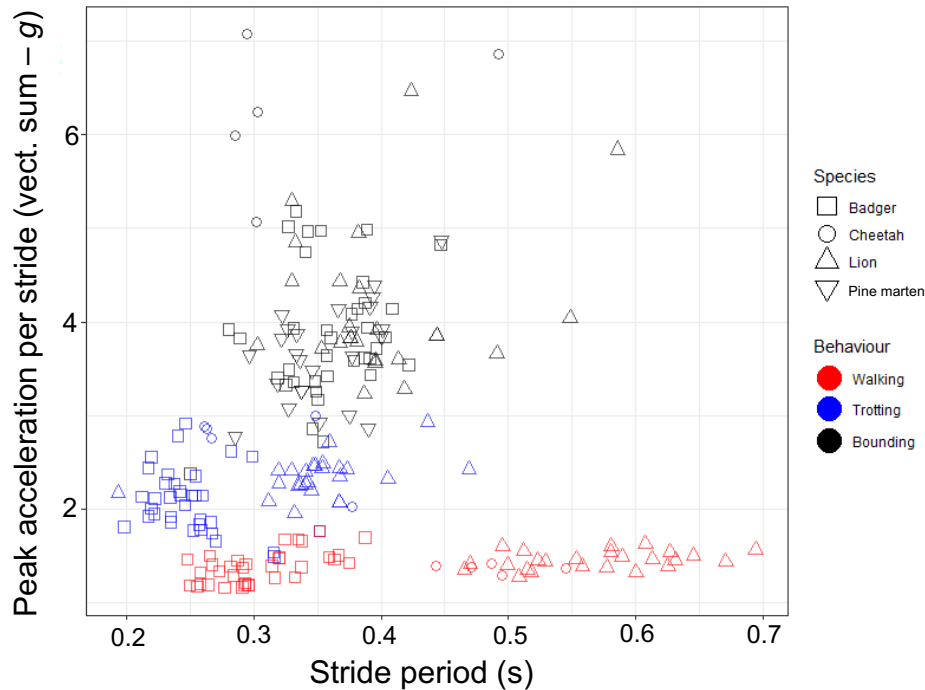

**Fig. 2. Body mass and stride period do not dictate peak tag acceleration.** Peak amplitudes of (the vectorial sum of) accelerations versus stride periods for four free-living carnivores (see symbols) travelling using different assumed gaits (colors). Each individual point shows a mean from a duration of activity >5 s from a single individual. See also Fig. S1 for similar data from domestic dogs.

5

10

Acceleration metrics changed even within particular gaits though, as exemplified by predators chasing prey. For example, overall, prey chases exhibited by lions showed mean peak accelerations increasing from 1 g to mid-chase peaks of *ca.* 5 g before decreasing again (Fig. 3). Assuming that these animals were carrying tags that amounted to 3% of their mass, this would result in forces amounting to up and beyond 15% of their normal body mass (e.g. Fig. 3). The maximum observed was 54% in the cheetah.

15

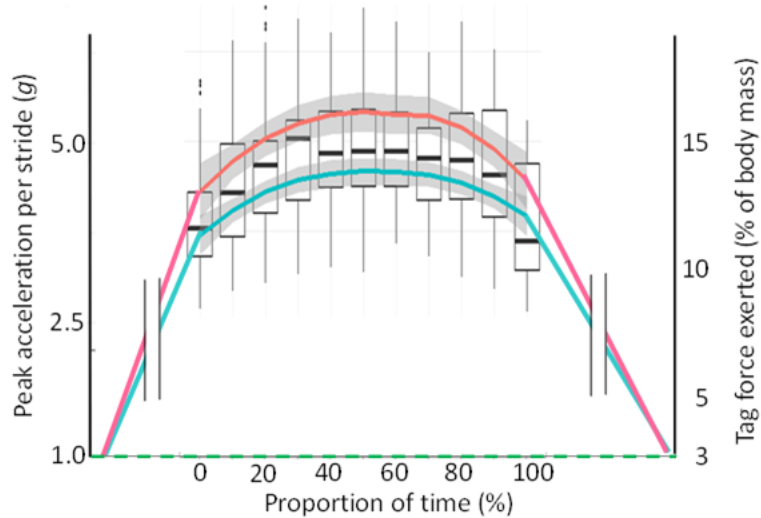

**Fig. 3. Hunting lions experience maximum tag forces mid-chase.** Box whisker plot [bold horizontal bars show means and boxes inter-quartile ranges] of the changing forces (the vectorial sum of the acceleration peaks per bound [cf. Fig. 1] and as a percentage of animal body mass assuming the tag constitutes 3% during non-movement) exerted by animal-attached tags on lions chasing prey as a function of the progression of the chase. Red and blue lines show grand means for 5 females and 5 males, respectively. The maximum acceleration was > 12.5 g, equating to a 3% tag exerting a force equivalent to 37.5% of the animal's normal weight.

10 In dogs, stride peak accelerations increased linearly with travel speed (Fig. 4) but at greater rates with increasing relative tag mass above tag masses equivalent to 1% of carrier body mass (there was a significant interaction effect between travel speed and tag % body mass:  $F_{3, 500} = 4.44$ ,  $P=0.004$ ,  $R^2 = 0.74$  Table S4). There was also a significant interaction effect between gait and tag mass as a percentage of carrier body mass ( $F_{6, 498} = 4.33$ ,  $P=0.0002$ ,  $R^2 = 0.74$ , Table S4).

15 Peak accelerations ranged from 4-18 g (fig S1-2) during bounding with collar tags equivalent to 3 % of the carrier body mass. Movement of the tag relative to the collar and body (flapping/swinging) was exacerbated under this condition and, as a consequence, the force exerted by the tags ranged from 20-50% of normal carrier body mass.

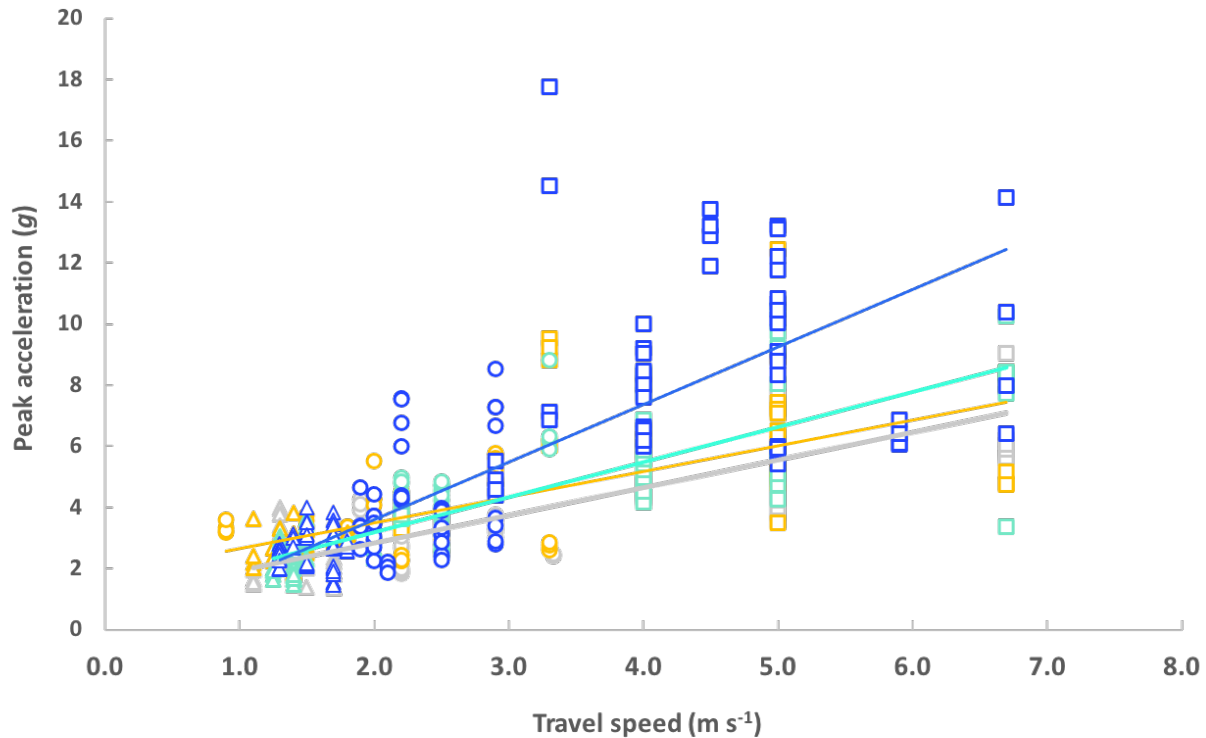

**Fig. 4. Travel speed and tag mass influence tag peak acceleration.** The relationship between peak accelerations and travel speed for 12 individual dogs (masses 2-45 kg), colored according to the percentage mass of the tag relative to the carrier; 0 (grey,  $y = 0.90x + 1.04$ ), 1 (yellow,  $y = 0.84x + 1.80$ ), 2 (light blue,  $y = 1.15x + 0.88$ ), 3 (dark blue,  $y = 1.88x - 0.16$ ). Data points are the means of the four greatest peaks in acceleration per 20 m trial per gait and dog. Data for walking, trotting and bounding gaits are represented as triangles, circles and squares, respectively. Coefficients for the best-fit lines are taken from the final model outputs (Table S4).

Stride peak accelerations were largely invariant with body mass ( $F_{1,10} = 3.51, P=0.09$ , Table S4) across dog breeds for any given gait (Fig. S2). Consequently, the peak forces exerted by the tags were directly proportional to tag mass and body mass. Accordingly, relative forces (force as a percentage of normal carrier body mass) were independent of carrier body mass (Table 4, Fig. S3).

## Discussion

A vehicle accelerating in a straight-line only experiences acceleration in the longitudinal axis. In contrast, the multiple limb-propelled motion of an animal with a flexible body produces complex trunk accelerations owing to the changing limb accelerations (17), synergistic effects of limb joint kinematics and limb muscle groups that contribute to the reduction and transfer of mechanical energy effecting shock absorption (19), and the mechanical work conducted within each stride (20). Ultimately, the magnitude of trunk accelerations depends on the combined variation in acceleration of the limbs, and the masses of those limbs (cf. 21). Thus, animals engaging in high performance activities are expected to produce high body accelerations, and have physiological and anatomical adaptations to enhance performance, such as fast twitch



muscles (22), and energy stored within tendons (23) for explosive release, which will increase this. Through all these complexities, tags mounted on the trunk of an animal result in extra forces being imposed that scale linearly with the acceleration of the tag and its mass. Consideration of animal lifestyle then, can already inform prospective tag users of the likely scale-up of the tag forces beyond the 1 g normally considered for tag detriment. Consequently, the 3-5% mass limits for slow-moving animals, such as sloths (*Bradipodidae*), seem most appropriate, while they may not be for pursuit predators, such as wild dogs (*Lycaon pictus*), regularly jumping animals like kangaroos (*Macropodidae*) or rutting ungulates (*Ungulata*). Beyond that, in our small sample of carnivores at least, which nonetheless covers about two orders of magnitude in mass, it seems that peak acceleration associated with gait varies little with mass, although larger animals have longer stride periods (Fig. 2 – cf. (24)). If these animals were to carry tags constituting 3% of their normal body mass, mean peak forces imposed by the tags would constitute *ca.* 4.5%, 6% and 12% of this body mass for walking, trotting and bounding gaits at frequencies of between 1.6 and 4 times per second (for walking lions and trotting badgers, respectively - Fig. 2, Table S2). Importantly, tag attachment is relevant in translating the acceleration experienced by the animal's trunk into tag-dependent forces acting on the animal, with collars predicted to be particularly problematic. A tag that couples tightly with its carrier's trunk, such as one attached with tape to a bird (25) or glue to a marine mammal (26), experiences acceleration that closely matches that of its substrate, so it exerts forces at a site where most of the animal's mass lies. In contrast, a device on a looser-fitting collar of a moving tetrapod not only exerts forces on the (less massive) head and neck areas, rather than the animal trunk, but the tag also oscillates between essentially two states: One is analogous to 'freefall', which occurs between pulses of animal trunk acceleration in the stride cycle which project the collar in a particular direction owing to its inertia and lack of a tight couple with the neck. The collar is therefore subject to peaks in acceleration when it interacts with the animal's neck, causing greater collar acceleration than would be the case if it were tightly attached to the animal's body (cf. peaks in Fig. 1). This explains why Dickinson et al. (27) reported that acceleration signatures from collar-mounted tags deployed on (speed-controlled) goats *Capra aegagrus* became increasingly variable with increasing collar looseness, and is analogous to the concerns related to injuries sustained by people in vehicles depending on seatbelt tightness (28). Partial answers to minimizing such problems may involve having padded collars that should reduce acceleration peaks, making sure that the tags themselves project minimally beyond the outer surface of the collar and having wider collars to reduce the pressure.

Having identified how animal movement changes the 3-5% tag rule, it is more problematic to understand how the identified forces translate into detriment. A prime effect is that higher forces and smaller contact areas will lead to higher pressure at the tag-animal interface because pressure = force/area. This can affect anything from fur/feather wear (29) to changing the underlying tissue (30) and, as would be predicted, is notably prominent in highly active species wearing thin collars (e.g. Howler monkeys *Alouatta palliata*, where 31% of animals wearing ball-chain radio-collars constituting just 1.2% of their mass sustain severe damage extending into the subcutaneous neck tissue and muscle (12)). But pressure-dependent detriment will also depend on the proportion and length of time to which an animal is exposed to excessive forces, with animals that spend large proportions of their time travelling, such as wild dogs, being particularly susceptible (31).

Perhaps more esoteric though, is the extent to which the inertia of a variable force-exerting tag ‘distracts’ its wearer, aside from the physical issues of load-bearing by animals. The tag mass as a percentage of carrier mass did not affect the gait-specific speeds selected by the domestic dogs in this study. However, it remains to be seen the extent to which a typical 30 kg cheetah wearing a collar that is 3% of its body mass, and therefore experiencing an additional force equivalent to up to 16 kg during every bound of a prey pursuit, might have its hunting capacity compromised. We note that the survival of such animals is believed to be especially sensitive to the proportion of successful hunts (cf.(32)) which calls for critical evaluation of performance between tag-wearing and unequipped animals, or animals equipped with tags of different masses (cf.(33)). In the meantime, we suggest two approaches to assessing likely tag force effects for planned tag deployments on animals. Firstly, simple consideration of animal lifestyle, where possible backed up by (tri-axial) acceleration metrics, will go some way to getting a more realistic assessment of potential for detriment. Secondly, we suggest that, where acceleration data are available from wild animals, consideration of a frequency histogram of the vector sum of the tag acceleration (Fig. 5) will help indicate the extent and intensity of the force interactions between the animal and its tag.

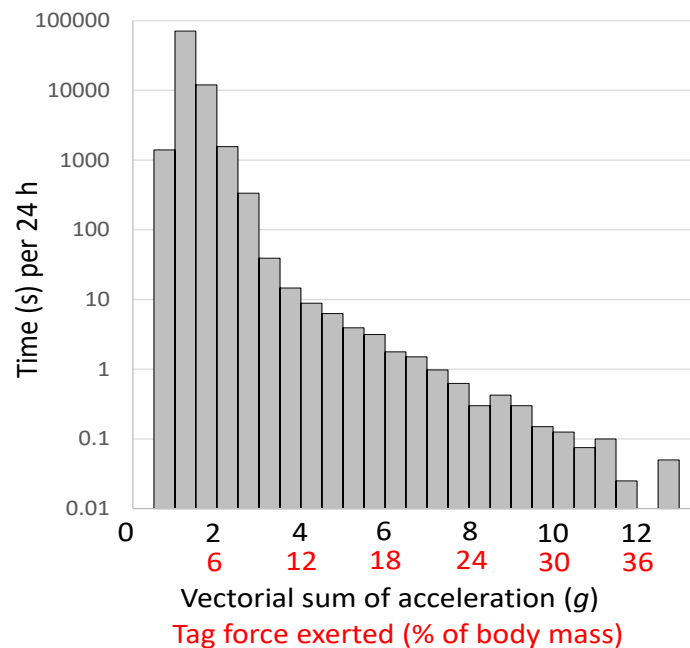

**Fig. 5. Tag forces on their animal carriers can be expressed in a time histogram.** Time (expressed as the log of the time) that a badger-attached tag spent subject to different accelerations over 24 h. The diagram also converts the acceleration values into forces imposed on the badger as a percentage of its normal body mass assuming the tag constitutes 3% during non-movement (axis in red). Although higher g-forces are a diminishingly small proportion of the badger’s time, their detrimental effect may not be a linear function of their values.

Small contributions in time to high forces should not be ignored simply due to their fractional components. Such issues can likely make the difference between a predator catching its prey or not, or worse, if the prey is wearing the tag, may result in it being caught.



Thus, while the contributions of animal-attached tag technology to advance scientific understanding are unquestionable, simple consideration of acceleration signatures of animal movements can go a long way to helping us understand how the effects of such tags on the behavior of their carriers vary with activity. Most importantly, these considerations should enable us to develop systems that minimize such effects, to the benefit of both animals and the science that their studies underpin.

## References and Notes:

1. D. D. Brown, R. Kays, M. Wikelski, R. Wilson, A. P. Klimley, Observing the unwatchable through acceleration logging of animal behavior. *Animal Biotelemetry* **1**, 20 (2013).
2. R. Kays, M. C. Crofoot, W. Jetz, M. Wikelski, Terrestrial animal tracking as an eye on life and planet. *Science* **345**, (2015).
3. A. M. Wilson *et al.*, Locomotion dynamics of hunting in wild cheetahs. *Nature* **498**, 185-189 (2013).
4. B. A. Block *et al.*, Tracking apex marine predator movements in a dynamic ocean. *Nature* **475**, 86-90 (2011).
5. R. P. Wilson, C. R. McMahon, Measuring devices on wild animals: what constitutes acceptable practice? *Frontiers in Ecology and the Environment* **4**, 147-154 (2006).
6. C. Saraux *et al.*, Reliability of flipper-banded penguins as indicators of climate change. *Nature* **469**, 203-206 (2011).
7. B. M. Culik, R. P. Wilson, R. Bannasch, Flipper-bands on penguins: what is the cost of a life-long commitment? *Marine Ecology Progress Series* **98**, 209-241 (1993).
8. D. A. Rosen, C. G. Gerlinsky, A. W. Trites, Telemetry tags increase the costs of swimming in northern fur seals, *Callorhinus ursinus*. *Marine Mammal Science* **34**, (2017).
9. W. P. Kay *et al.*, Minimizing the impact of biologging devices: Using computational fluid dynamics for optimizing tag design and positioning. *Methods Ecol Evol* **10**, 1222-1233 (2019).
10. Murray DL, F. MR, in *Research Techniques in Animal Ecology: Controversies and Consequences*, Pearl MC, Biotani L, F. TK, Eds. (Columbia University Press, Columbia University Press, 2000), pp. 15-64.
11. J. A. Stabach *et al.*, Short-term effects of GPS collars on the activity, behavior, and adrenal response of scimitar-horned oryx (*Oryx dammah*). *Plos One*, (2020).
12. M. Hopkins, K. Milton, Adverse Effects of Ball-Chain Radio-Collars on Female Mantled Howlers (*Alouatta palliata*) in Panama. *International Journal of Primatology* **37**, 213-224 (2016).
13. P. R. Krausman *et al.*, Neck Lesions in Ungulates from Collars Incorporating Satellite Technology. *Wildlife Society Bulletin 1973-2006* **32**, 987-991 (2004).
14. C. Brooks, C. Bonyongo, S. Harris, Effects of Global Positioning System Collar Weight on Zebra Behavior and Location Error. *The Wildlife Society* **72**, 527-534 (2010).
15. A. L. Rasiulis, Festa-Bianchet Marco, S. Couturier, S. D. Cote, The effect of radio-collar weight on survival of migratory caribou. *The Journal of Wildlife Management* **78**, 953-956 (2014).
16. R. E. Kenward, *A manual for wildlife radio tagging*. (Academic press, 2000).
17. A. C. Gleiss, R. P. Wilson, E. L. Shepard, Making overall dynamic body acceleration work: on the theory of acceleration as a proxy for energy expenditure. *Methods Ecol Evol* **2**, 23-33 (2011).
18. Dewhirst OP *et al.*, Improving the accuracy of estimates of animal path and travel distance using GPS drift-corrected dead reckoning *Ecology and Evolution* **6**, 6210-6222 (2016).
19. X. Wu *et al.*, Contributions of Limb Joints to Energy Absorption during Landing in Cats. *Appl Bionics Biomech* **2019**, 3815612 (2019).

20. A. A. Biewener, Patterns of mechanical energy change in tetrapod gait: pendula, springs and work. *Journal of Experimental Zoology Part A: Comparative Experimental Biology* **305**, 899-911 (2006).
21. A. C. Gleiss, R. P. Wilson, E. L. Shepard, Making overall dynamic body acceleration work: on the theory of acceleration as a proxy for energy expenditure. *Methods in Ecology and Evolution* **2**, 23-33 (2011).
22. R. J. Gregor, V. R. Edgerton, J. J. Perrine, D. S. Campion, C. DeBus, Torque-velocity relationships and muscle fiber composition in elite female athletes. *Journal of Applied Physiology* **47**, 388-392 (1979).
23. R. M. Alexander, Tendon elasticity and muscle function. *Comparative biochemistry and physiology part a: Molecular & integrative physiology* **133**, 1001-1011 (2002).
24. C. T. Farley, J. Glasheen, T. A. McMahon, Running springs: speed and animal size. *J Exp Biol* **185**, 71-86 (1993).
25. R. P. Wilson *et al.*, Long-term attachment of transmitting and recording devices to penguins and other seabirds. *Wildlife Society Bulletin (1973-2006)* **25**, 101-106 (1997).
26. I. C. Field *et al.*, Refining instrument attachment on phocid seals. *Marine Mammal Science* **28**, E325-E332 (2012).
27. E. R. Dickinson, P. A. Stephens, N. J. Marks, R. P. Wilson, D. M. Scantlebury, Best practice for collar deployment of tri-axial accelerometers on a terrestrial quadruped to provide accurate measurement of body acceleration. *Animal Biotelemetry* **9**, (2020).
28. N. Hodson-Walker, The value of safety belts: a review. *Canadian Medical Association Journal* **102**, 391 (1970).
29. V. K. H. Young, R. W. Blob, Comparative limb bone scaling and shape in turtles: relationships with functional demands. *Integr Comp Biol* **56**, E398-E398 (2016).
30. S. Michael, B. Gartrell, S. Hunter, Humeral remodeling and soft tissue injury of the wings caused by backpack harnesses for radio transmitters in New Zealand Takahe (*Porphyrio hochstetteri*). *J Wildl Dis* **49**, 552-559 (2013).
31. M. A. Pomilia, J. W. McNutt, M. R. Jorndan, Ecological predictors of African wild dog ranging patterns in northern Botswana *Journal of Mammalogy* **96**, 1214–1223 (2015).
32. D. M. Scantlebury *et al.*, Flexible energetics of cheetah hunting strategies provide resistance against kleptoparasitism. *Science* **346**, (2014).
33. R. P. Wilson, W. S. Grant, D. C. Duffy, Recording Devices on Free-Ranging Marine Animals: Does Measurement Affect Foraging Performance? *Ecology* **67**, 1091-1093 (1986).

**Acknowledgments:** We gratefully acknowledge the access provided by the National Trust and Forest Service NI. We are also grateful to the RSPCA's Llys Nini Wildlife Centre in Penllergaer, Wales, and to Judy Corbett and Peter Welford at Gwydir Castle in Llanrwst, Wales, for allowing us to work on their property with their dogs. We thank Derek van Heerden and the staff at Harnas Wildlife Foundation in Namibia for their kindness and supporting our work. We thank SANParks and the Department of Wildlife and National Parks, Botswana for allowing our research in the Kgalagadi Transfrontier Park (Permit Number SCAM 1550). We are grateful to Angela Bruns, Sam Ferreira and Danny Govender and Pauli Viljoun for facilitating the research and to the many field staff and volunteers that conducted the fieldwork including Wayne Oppel, Corera Links, Martin van Rooyen and Mads Frost Bertelsen. We are grateful to Fraser Menzies and all the field staff at the Department of Agriculture, Environment and Rural Affairs, DARD. We are also grateful to the Vincent wildlife trust for supporting this research. **Funding:** This research also contributes to the CAASE project funded by King Abdullah University of Science and Technology (KAUST) under the KAUST Sensor Initiative. This work acknowledges support from the Royal Society/Wolfson Lab refurbishment scheme (RPW). We are grateful for funding from Department of Learning and the Challenge Funding, and access provided by the National Trust and Forest Service NI. The cheetah research was supported by the Royal Society (2009/R3 JP090604) and Natural Environment Research Council (NE/I002030/1) (DMS). The lion work was supported by a Department for Economy Global Challenges Research Fund (DMS) with ethics approval from Queen's University Belfast (QUB-BS-AREC-18-006), Pretoria University (NAS061-19) and South

5 African National Parks. The badger work was funded by and the Department of Agriculture and Rural Development (DARD) Northern Ireland (currently the Department of Agriculture, Environment and Rural Affairs) through various studentships (DMS, NJM). The Pine marten work was funded by a Department for the Economy studentship to JPT (DMS, NJM); **Author contributions:** RPW conceived the work and wrote the manuscript with KAR and DMS. RG, SHB, NM, JPT, J.H and DMS collected data, which was analyzed by RPW, KAR, RG and DMS using software developed by MH. All authors provided valuable input to the writing and primary analysis.; **Competing interests:** Authors declare no competing interests; and **Data and materials availability:** All data will be made available on Figshare following acceptance for publication.

### Supplementary Materials:

10 Materials and Methods

Figures S1-S3

Tables S1-S5

Reference (33)
